# Supplementary material
Source: HighWire-hosted journal article supplement (https://tobaccocontrol.bmj.com/highwire/filestream/166526/field_highwire_adjunct_files/0/tc-2022-057871supp001_data_supplement.pdf)
Supplement: tc-2022-057871supp001_data_supplement.pdf [file tc-2022-057871supp001_data_supplement.pdf]

| <b>Supplementary Table 1: Measures assessing short-fills, vaping and smoking status.</b>                                                                                                                                                                                                                                                                                                                                                                                                                                                                                                                       |
|----------------------------------------------------------------------------------------------------------------------------------------------------------------------------------------------------------------------------------------------------------------------------------------------------------------------------------------------------------------------------------------------------------------------------------------------------------------------------------------------------------------------------------------------------------------------------------------------------------------|
| <p><i>Awareness of short-fills:</i></p> <p>All respondents were asked, "Have you ever heard of a "shortfill" e-liquid (i.e., a nicotine-free e-liquid that you mix with a separate bottle of nicotine)?"</p> <p>Responses were coded:</p> <ul style="list-style-type: none"> <li>• Yes</li> <li>• Other (No, don't know)</li> </ul> <p>Refusals were excluded</p>                                                                                                                                                                                                                                              |
| <p><i>Past 30-day short-fill use:</i></p> <p>Youth who vaped in the past 30-days who were aware of short-fills were asked, "In the past 30 days, have you <u>used</u> a "shortfill" e-liquid (i.e., a nicotine-free e-liquid that you mix with a separate bottle of nicotine)?"</p> <p>Responses were coded:</p> <ul style="list-style-type: none"> <li>• Yes</li> <li>• Other (No, don't know)*</li> </ul> <p>Refusals were excluded</p> <p>*In deviation from pre-registered analysis, youth who vaped in the past 30-days who were not aware of short-fills were also coded as 'Other'.</p>                 |
| <p><i>Reason(s) for short-fill use:</i></p> <p>Those who had used a short-fill in the past 30 days were asked, "Have you used "shortfill" e-liquids for any of the following reasons? (select all that apply)"</p> <p>Options available:</p> <ul style="list-style-type: none"> <li>• To use nicotine-free e-liquid</li> <li>• To get a higher nicotine concentration (over 20mg/mL)</li> <li>• Less expensive than regular e-liquid</li> <li>• Convenience of a bigger bottle</li> <li>• To get a custom flavour or PG/VG mix</li> <li>• Other</li> <li>• Don't know</li> </ul> <p>Refusals were excluded</p> |
| <p><i>Vaping status:</i></p> <p>Vaping status was constructed from two questions: "Have you ever tried an e-cigarette/vaped, even one or two puffs?" and "When was the last time you used an e-cigarette/vaped?"</p> <p>Responses were coded:</p> <ul style="list-style-type: none"> <li>• Vaped in past 30-days</li> <li>• Ever vaped (ever tried vaping but not vaped in the past 30 days),</li> <li>• Never vaped</li> </ul> <p>Refusals were excluded</p>                                                                                                                                                  |
| <p><i>Smoking status</i></p> <p>Smoking status was constructed from three questions: "Have you ever tried cigarette smoking, even one or two puffs?", "How many cigarettes have you smoked in your entire life?" and "When was the last time you smoked a cigarette, even one or two puffs?"</p> <p>Responses were coded:</p> <ul style="list-style-type: none"> <li>• Currently smoke (smoked in the past 30 days and smoked 100 or more cigarettes in lifetime)</li> </ul>                                                                                                                                   |

|                                                                                                                                                                                                                                                                                                                                                                                                                                                                                                                                                                                                                                                                                                                                                                                                                                                                                         |
|-----------------------------------------------------------------------------------------------------------------------------------------------------------------------------------------------------------------------------------------------------------------------------------------------------------------------------------------------------------------------------------------------------------------------------------------------------------------------------------------------------------------------------------------------------------------------------------------------------------------------------------------------------------------------------------------------------------------------------------------------------------------------------------------------------------------------------------------------------------------------------------------|
| <ul style="list-style-type: none"> <li>• Ever smoked (tried smoking but smoked less than 100 cigarettes in lifetime or not smoked in the past 30 days)</li> <li>• Never smoked</li> </ul> <p>Refusals were excluded</p>                                                                                                                                                                                                                                                                                                                                                                                                                                                                                                                                                                                                                                                                 |
| Dual use                                                                                                                                                                                                                                                                                                                                                                                                                                                                                                                                                                                                                                                                                                                                                                                                                                                                                |
| Smoking and vaping variables were combined from the responses detailed above                                                                                                                                                                                                                                                                                                                                                                                                                                                                                                                                                                                                                                                                                                                                                                                                            |
| <p>Responses were coded:</p> <ul style="list-style-type: none"> <li>• Dual use (currently smoke, and vaped in the past 30 days)</li> <li>• Exclusively vape (vaped in the past 30 days, and ever or never smoked)</li> <li>• Exclusively smoke (currently smoke, and ever or never vaped)</li> <li>• Formally smoked/vaped (ever smoked and vaped, or ever smoked and never vaped, or ever vaped and never smoked)</li> <li>• Never smoked/vaped (never smoked and never vaped)</li> </ul>                                                                                                                                                                                                                                                                                                                                                                                              |
| <i>Nicotine concentration</i>                                                                                                                                                                                                                                                                                                                                                                                                                                                                                                                                                                                                                                                                                                                                                                                                                                                           |
| <p>Youth who had vaped in the past 30-days were asked, “Do the e-cigarettes, cartridges, pods, or e-liquids you currently use contain nicotine?”.</p> <p>Those who responded ‘No’ were coded ‘0%(0 mg/mL)’.</p> <p>If participants responded ‘Yes’, they were asked “How much nicotine do the e-cigarettes, cartridges, pods, or e-liquids you currently use contain?” with categories as percentages or mg/mL, in 1% (10mg/mL) increments.</p> <p>If they responded ‘2-2.9%(20-29mg/mL)’, a clarification question asked, “You said 2% to 2.9% (20-29mg/mL). Would that be...” with options 2.0% (20mg/mL), or 2.1-2.9% (21-29mg/mL).</p> <p>Responses were coded:</p> <ul style="list-style-type: none"> <li>• 0% (0 mg/mL)</li> <li>• 0.1-1.9% (1-19mg/mL)</li> <li>• 2% (20mg/ml)</li> <li>• 2.1% (21 mg/mL or more)</li> <li>• Don’t Know</li> </ul> <p>Refused’ were removed.</p> |

| <b>Supplementary table 2: Awareness and use of short-fills by respondent characteristics. ITC Youth Survey, England, 2021, weighted %(n)</b>     |                                                       |                                   |                  |                                                       |                                                       |                  |       |
|--------------------------------------------------------------------------------------------------------------------------------------------------|-------------------------------------------------------|-----------------------------------|------------------|-------------------------------------------------------|-------------------------------------------------------|------------------|-------|
| Outcome                                                                                                                                          |                                                       | A. Aware of short-fills           |                  |                                                       | B. Used a short-fill in the past 30 days              |                  |       |
| Sample                                                                                                                                           | Total<br>N=4224                                       | Among all respondents<br>(n=4224) |                  |                                                       | Among youth who vaped in the past 30-<br>days (n=747) |                  |       |
|                                                                                                                                                  | %(n)                                                  | %(n)                              | AOR (95% CI)     | p                                                     | %(n)                                                  | AOR (95% CI)     | p     |
| <b>Model 1</b>                                                                                                                                   |                                                       |                                   |                  |                                                       |                                                       |                  |       |
| <b>Total</b>                                                                                                                                     |                                                       | 23.0(974)                         |                  |                                                       | 22.1(150)                                             |                  |       |
| <b>Vaping</b>                                                                                                                                    |                                                       |                                   |                  |                                                       |                                                       |                  |       |
| Never vaped                                                                                                                                      | 57.5(2429)                                            | 18.4(471)                         | 1                | Ref                                                   | -                                                     | -                | -     |
| Ever vaped                                                                                                                                       | 24.8(1048)                                            | 21.8(219)                         | 0.93(0.73-1.18)  | .550                                                  | -                                                     | -                | -     |
| Vaped in past 30-days                                                                                                                            | 17.7(747)                                             | 41.9(284)                         | 2.14(1.67-2.74)  | <.001                                                 | 22.1(150)                                             | -                | -     |
| <b>Smoking</b>                                                                                                                                   |                                                       |                                   |                  |                                                       |                                                       |                  |       |
| Never smoked                                                                                                                                     | 58.9(2486)                                            | 18.1(471)                         | 1                | Ref                                                   | 5.3(6)                                                | 1                |       |
| Ever smoked                                                                                                                                      | 33.9(1433)                                            | 27.0(370)                         | 1.30(1.05-1.61)  | .015                                                  | 19.5(83)                                              | 4.58(1.60-13.14) | .005  |
| Currently smoke                                                                                                                                  | 7.2(305)                                              | 50.9(133)                         | 3.13(2.26-4.33)  | <.001                                                 | 43.2(61)                                              | 13.7(4.56-40.93) | <.001 |
| <b>Age group</b>                                                                                                                                 |                                                       |                                   |                  |                                                       |                                                       |                  |       |
| 16-17                                                                                                                                            | 43.7(1845)                                            | 18.4(391)                         | 1                | Ref                                                   | 21.5(59)                                              | 1                |       |
| 18-19                                                                                                                                            | 56.3(2379)                                            | 27.6(583)                         | 1.52(1.27-1.80)  | <.001                                                 | 22.6(91)                                              | 1.02(0.63-1.65)  | .942  |
| <b>Sex</b>                                                                                                                                       |                                                       |                                   |                  |                                                       |                                                       |                  |       |
| Male                                                                                                                                             | 34.5(1455)                                            | 23.6(514)                         | 1                | Ref                                                   | 30.2(100)                                             | 1                |       |
| Female                                                                                                                                           | 65.5(2769)                                            | 22.3(460)                         | 0.91(0.77-1.08)  | .272                                                  | 14.5(50)                                              | 0.40(0.26-0.62)  | <.001 |
| <b>Race/ethnicity</b>                                                                                                                            |                                                       |                                   |                  |                                                       |                                                       |                  |       |
| White                                                                                                                                            | 68.0(2873)                                            | 23.0(655)                         | 1                | Ref                                                   | 23.6(120)                                             | 1                |       |
| All other racial/ethnic groups combined                                                                                                          | 32.0(1351)                                            | 23.0(289)                         | 1.12(0.93-1.35)  | .231                                                  | 17.8(30)                                              | 0.99(0.58-1.72)  | .990  |
| <b>Model 2</b>                                                                                                                                   | Among youth who had vaped in the past 30-days (n=747) |                                   |                  | Among youth who had vaped in the past 30-days (n=747) |                                                       |                  |       |
| <b>Nicotine concentration</b>                                                                                                                    |                                                       |                                   |                  |                                                       |                                                       |                  |       |
| 0% (0mg/ml)                                                                                                                                      | 40.7(304)                                             | 31.8(88)                          | 1                | Ref                                                   | 11.9(33)                                              | 1                | Ref   |
| 0.1%-1.9%(1-19mg/ml)                                                                                                                             | 27.6(206)                                             | 54.1(98)                          | 1.68(1.06-2.69)  | .029                                                  | 32.5(59)                                              | 2.40(1.32-4.39)  | .004  |
| 2.0% (20mg/ml)                                                                                                                                   | 8.0(60)                                               | 45.8(23)                          | 1.41(0.74-2.69)  | .294                                                  | 31.7(15)                                              | 2.64(1.14-6.13)  | .024  |
| ≥2.1% (≥21mg/ml)                                                                                                                                 | 11.4(85)                                              | 61.7(55)                          | 2.22(1.23-3.99)  | .008                                                  | 40.8(37)                                              | 3.16(1.53-6.49)  | .002  |
| Don't know                                                                                                                                       | 12.3(92)                                              | 24.3(24)                          | 0.59(0.31-1.10)  | .097                                                  | 7.4(6)                                                | 3.16(1.53-6.49)  | .119  |
| <b>Vaping</b>                                                                                                                                    |                                                       |                                   |                  |                                                       |                                                       |                  |       |
| Never vaped                                                                                                                                      | -                                                     | -                                 | -                | -                                                     | -                                                     | -                | -     |
| Ever vaped                                                                                                                                       | -                                                     | -                                 | -                | -                                                     | -                                                     | -                | -     |
| Vaped in past 30-day                                                                                                                             | 100(747)                                              | 41.9(284)                         | -                | -                                                     | 22.1(150)                                             | -                | -     |
| <b>Smoking</b>                                                                                                                                   |                                                       |                                   |                  |                                                       |                                                       |                  |       |
| Never smoked                                                                                                                                     | 15.1(113)                                             | 19.7(22)                          | 1                | Ref                                                   | 5.3(6)                                                | 1                | Ref   |
| Ever smoked                                                                                                                                      | 63.5(474)                                             | 40.0(171)                         | 2.63(1.40-4.95)  | .003                                                  | 19.5(83)                                              | 3.92(1.32-11.69) | .014  |
| Currently smoke                                                                                                                                  | 21.4(160)                                             | 64.7(91)                          | 5.97(2.88-12.35) | <.001                                                 | 43.2(61)                                              | 9.16(2.90-29.00) | <.001 |
| <b>Age group</b>                                                                                                                                 |                                                       |                                   |                  |                                                       |                                                       |                  |       |
| 16-17                                                                                                                                            | 32.7(244)                                             | 36.7(100)                         | 1                | Ref                                                   | 21.5(59)                                              | 1                | Ref   |
| 18-19                                                                                                                                            | 67.3(503)                                             | 45.4(183)                         | 1.38(0.93-2.06)  | .109                                                  | 22.6(91)                                              | 0.94(0.57-1.56)  | .814  |
| <b>Sex</b>                                                                                                                                       |                                                       |                                   |                  |                                                       |                                                       |                  |       |
| Male                                                                                                                                             | 31.6(236)                                             | 53.2(175)                         | 1                | Ref                                                   | 30.2(100)                                             | 1                | Ref   |
| Female                                                                                                                                           | 68.4(511)                                             | 31.2(109)                         | 0.40(0.28-0.59)  | <.001                                                 | 14.5(50)                                              | 0.43(0.27-0.68)  | <.001 |
| <b>Race/ethnicity</b>                                                                                                                            |                                                       |                                   |                  |                                                       |                                                       |                  |       |
| White                                                                                                                                            | 72.6(542)                                             | 42.6(217)                         | 1                | Ref                                                   | 23.6(120)                                             | 1                | Ref   |
| All other racial/ethnic groups combined                                                                                                          | 27.4(205)                                             | 39.6(66)                          | 1.15(0.76-1.74)  | .515                                                  | 17.8(30)                                              | 0.91(0.53-1.57)  | .743  |
| All analyses were weighted                                                                                                                       |                                                       |                                   |                  |                                                       |                                                       |                  |       |
| Model 1 was adjusted for age, sex, race/ethnicity, smoking, vaping                                                                               |                                                       |                                   |                  |                                                       |                                                       |                  |       |
| Model 2 included only youth who had vaped in the past 30-days and was adjusted for age, sex, race/ethnicity, smoking and nicotine concentration. |                                                       |                                   |                  |                                                       |                                                       |                  |       |

**Supplementary table 3: Associations between awareness of short-fills and dual use status. ITC Youth Survey, England, 2021, weighted**

|                                                                   | Aware of short-fills<br>N=4224 |                 |       |
|-------------------------------------------------------------------|--------------------------------|-----------------|-------|
|                                                                   | %(n)                           | AOR (95% CI)    | p     |
| <b>Dual status</b>                                                |                                |                 |       |
| Dual use                                                          | 64.7(92)                       | 1               | Ref   |
| Exclusively vape                                                  | 35.9(192)                      | 0.31(0.20-0.47) | <.001 |
| Exclusively smoke                                                 | 34.7(42)                       | 0.29(0.17-0.50) | <.001 |
| Formally smoked/vaped                                             | 20.4(265)                      | 0.14(0.09-0.21) | <.001 |
| Never smoked/vaped                                                | 17.9(383)                      | 0.13(0.09-0.19) | <.001 |
| Adjusted for age, sex and ethnicity<br>All analysis were weighted |                                |                 |       |

**Supplementary table 4: Reasons for short-fill use among those who have used short-fills in the past 30 days, ITC Youth Survey, England, 2021, weighted %(n)**

|                                                                             | Use a nicotine free e-liquid | Higher nicotine concentration | Less expensive | Bigger bottle | Custom flavour or PG/VG |
|-----------------------------------------------------------------------------|------------------------------|-------------------------------|----------------|---------------|-------------------------|
|                                                                             | %(n)                         | %(n)                          | %(n)           | %(n)          | %(n)                    |
| <b>Total</b>                                                                | 25.4(38)                     | 27.6(41)                      | 37.6(56)       | 45.0(67)      | 34.5(52)                |
| <b>Age group</b>                                                            |                              |                               |                |               |                         |
| 16-17 years                                                                 | 26.0(15)                     | 24.8(15)                      | 53.0(31)       | 49.5(29)      | 40.8(24)                |
| 18-19 years                                                                 | 25.1(23)                     | 28.3(27)                      | 27.8(25)       | 42.0(38)      | 30.4(28)                |
| <b>Sex</b>                                                                  |                              |                               |                |               |                         |
| Male                                                                        | 20.7(20)                     | 33.2(33)                      | 38.1(38)       | 48.9(48)      | 41.4(41)                |
| Female                                                                      | 34.8(18)                     | 16.5(8)                       | 36.7(18)       | 37.3(19)      | 20.8(11)                |
| <b>Race/ethnicity</b>                                                       |                              |                               |                |               |                         |
| White                                                                       | 24.1(29)                     | 22.8(27)                      | 37.9(45)       | 50.1(60)      | 35.8(43)                |
| All other racial/ethnic groups combined                                     | 30.6(9)                      | 46.6(14)                      | 36.4(11)       | 24.4(7)       | 29.2(9)                 |
| <b>Smoking</b>                                                              |                              |                               |                |               |                         |
| Never smoked                                                                | 57.4(3)                      | 26.3(20)                      | 16.6(1)        | 0.0(0)        | 0.0(0)                  |
| Ever smoked                                                                 | 57.4(18)                     | 18.0(1)                       | 36.9(31)       | 47.8(40)      | 30.0(25)                |
| Current smoked                                                              | 27.2(17)                     | 33.2(20)                      | 40.6(25)       | 45.4(27)      | 43.8(27)                |
| <b>Usual nicotine concentration</b>                                         |                              |                               |                |               |                         |
| 0% (0mg/ml)                                                                 | 42.3(14)                     | 5.0(2)                        | 43.1(14)       | 41.0(13)      | 20.8(7)                 |
| 0.1%-1.9%(1-19mg/ml)                                                        | 28.5(17)                     | 27.6(16)                      | 34.3(20)       | 55.7(33)      | 37.9(22)                |
| 2.0% (20mg/ml)                                                              | 19.9(5)                      | 34.4(17)                      | 36.6(18)       | 32.7(16)      | 39.9(20)                |
| ≥2.1% (≥21mg/ml)                                                            | 27.5(1)                      | 70.6(2)                       | 71.5(3)        | 42.1(2)       | 27.5(1)                 |
| Don't know                                                                  | 18.4(1)                      | 69.4(4)                       | 28.5(2)        | 62.0(3)       | 35.9(2)                 |
| All analyses were weighted<br>Participants could provide multiple responses |                              |                               |                |               |                         |
